# Supplementary material
Source: publisher figshare collection journal article supplement (https://acs.figshare.com/ndownloader/files/5107252)
Supplement: Supplementary file 1 [file 5107252]

#
# Title:
# K(UO)Si2O6: A Pentavalent-Uranium Silicate 
# 
# Authors: Chih-Shan, Shang-Fan Lee, and Kwang-Hwa Lii
# E-mail: liikh@cc.ncu.edu.tw
#
data_fullm 
 _audit_creation_method            SHELXL-97 
# SUBMISSION DETAILS
_publ_section_title
;
K(UO)Si2O6: A Pentavalent-Uranium Silicate
;
_publ_section_references    'See Main paper'
_publ_contact_author_name   'Professor Kwang-Hwa Lii'
_publ_contact_author_address
;
Department of Chemistry
National Central University
Chungli 
Taiwan 320, R.O.C.
;
_publ_contact_author_email      liikh@cc.ncu.edu.tw
_publ_requested_journal        ' J. Am. Chem. Soc.'


# AUTHORS LIST
loop_
_publ_author_name
_publ_author_address 
'Chih-Shan Chen'
; Department of Chemistry
  National Central University
  Chungli 
  Taiwan 320, R.O.C.
;
'Shang-Fan Lee'
; Institute of Physics
  Academia Sinica
  Taipei
  Taiwan 115, R.O.C.
;
'Kwang-Hwa Lii'
; Department of Chemistry
  National Central University
  Chungli 
  Taiwan 320, R.O.C.
  and 
  Institute of Chemistry
  Academia Sinica
  Taipei
  Taiwan 115, R.O.C.
;
# TEXT

_publ_section_abstract 'See Main paper'
_publ_section_comment  'See Main paper'
_chemical_name_systematic 
; 
 ? 
; 
_chemical_name_common             ? 
_chemical_melting_point           ? 
_chemical_formula_moiety          K(UO)Si2O6 
_chemical_formula_sum             'K O7 Si2 U' 
_chemical_formula_weight          445.31 
 
loop_ 
 _atom_type_symbol 
 _atom_type_description 
 _atom_type_scat_dispersion_real 
 _atom_type_scat_dispersion_imag 
 _atom_type_scat_source 
 'O'  'O'   0.0106   0.0060 
 'International Tables Vol C Tables 4.2.6.8 and 6.1.1.4' 
 'Si'  'Si'   0.0817   0.0704 
 'International Tables Vol C Tables 4.2.6.8 and 6.1.1.4' 
 'K'  'K'   0.2009   0.2494 
 'International Tables Vol C Tables 4.2.6.8 and 6.1.1.4' 
 'U'  'U'  -9.6767   9.6646 
 'International Tables Vol C Tables 4.2.6.8 and 6.1.1.4' 
 
_symmetry_cell_setting            tetragonal 
_symmetry_space_group_name_H-M    P4/mbm
 
loop_ 
 _symmetry_equiv_pos_as_xyz 
 'x, y, z' 
 '-x, -y, z' 
 '-y, x, z' 
 'y, -x, z' 
 '-x+1/2, y+1/2, -z' 
 'x+1/2, -y+1/2, -z' 
 'y+1/2, x+1/2, -z' 
 '-y+1/2, -x+1/2, -z' 
 '-x, -y, -z' 
 'x, y, -z' 
 'y, -x, -z' 
 '-y, x, -z' 
 'x-1/2, -y-1/2, z' 
 '-x-1/2, y-1/2, z' 
 '-y-1/2, -x-1/2, z' 
 'y-1/2, x-1/2, z' 
 
_cell_length_a                    9.1428(3) 
_cell_length_b                    9.1428(3) 
_cell_length_c                    8.2587(6) 
_cell_angle_alpha                 90.00 
_cell_angle_beta                  90.00 
_cell_angle_gamma                 90.00 
_cell_volume                      690.35(6) 
_cell_formula_units_Z             4 
_cell_measurement_temperature     293 
_cell_measurement_reflns_used     ? 
_cell_measurement_theta_min       ? 
_cell_measurement_theta_max       ? 
 
_exptl_crystal_description        'square tablet'
_exptl_crystal_colour             brown 
_exptl_crystal_size_max           0.08 
_exptl_crystal_size_mid           0.08 
_exptl_crystal_size_min           0.06 
_exptl_crystal_density_meas       ? 
_exptl_crystal_density_diffrn     4.285 
_exptl_crystal_density_method     'not measured' 
_exptl_crystal_F_000              780 
_exptl_absorpt_coefficient_mu     24.450 
_exptl_absorpt_correction_type    empirical 
_exptl_absorpt_correction_T_min   0.634 
_exptl_absorpt_correction_T_max   0.980 
_exptl_absorpt_process_details    'SADABS program' 
 
_exptl_special_details 
; 
 ? 
; 
 
_diffrn_ambient_temperature       294(2) 
_diffrn_radiation_wavelength      0.71073 
_diffrn_radiation_type            MoK\a 
_diffrn_radiation_source          'fine-focus sealed tube' 
_diffrn_radiation_monochromator   graphite 
_diffrn_measurement_device_type   CCD 
_diffrn_measurement_method        'omega scans' 
_diffrn_detector_area_resol_mean  ? 
_diffrn_standards_number          ? 
_diffrn_standards_interval_count  ? 
_diffrn_standards_interval_time   ? 
_diffrn_standards_decay_%         ? 
_diffrn_reflns_number             4759 
_diffrn_reflns_av_R_equivalents   0.0352 
_diffrn_reflns_av_sigmaI/netI     0.0153 
_diffrn_reflns_limit_h_min        -9 
_diffrn_reflns_limit_h_max        12 
_diffrn_reflns_limit_k_min        -11 
_diffrn_reflns_limit_k_max        12 
_diffrn_reflns_limit_l_min        -10 
_diffrn_reflns_limit_l_max        11 
_diffrn_reflns_theta_min          2.47 
_diffrn_reflns_theta_max          28.28 
_reflns_number_total              500 
_reflns_number_gt                 440 
_reflns_threshold_expression      >2sigma(I) 
 
_computing_data_collection        ? 
_computing_cell_refinement        ? 
_computing_data_reduction         ? 
_computing_structure_solution     'SHELXS-97 (Sheldrick, 1990)' 
_computing_structure_refinement   'SHELXL-97 (Sheldrick, 1997)' 
_computing_molecular_graphics     'Diamond' 
_computing_publication_material   ? 
 
_refine_special_details 
; 
 Refinement of F^2^ against ALL reflections.  The weighted R-factor wR and 
 goodness of fit S are based on F^2^, conventional R-factors R are based 
 on F, with F set to zero for negative F^2^. The threshold expression of 
 F^2^ > 2sigma(F^2^) is used only for calculating R-factors(gt) etc. and is 
 not relevant to the choice of reflections for refinement.  R-factors based 
 on F^2^ are statistically about twice as large as those based on F, and R- 
 factors based on ALL data will be even larger. 
; 
 
_refine_ls_structure_factor_coef  Fsqd  
_refine_ls_matrix_type            full 
_refine_ls_weighting_scheme       calc  
_refine_ls_weighting_details 
 'calc w=1/[\s^2^(Fo^2^)+(0.0167P)^2^+0.0000P] where P=(Fo^2^+2Fc^2^)/3' 
_atom_sites_solution_primary      direct 
_atom_sites_solution_secondary    difmap 
_atom_sites_solution_hydrogens    ?
_refine_ls_hydrogen_treatment     ?
_refine_ls_extinction_method      SHELXL 
_refine_ls_extinction_coef        0.0091(3) 
_refine_ls_extinction_expression 
 'Fc^*^=kFc[1+0.001xFc^2^\l^3^/sin(2\q)]^-1/4^' 
_refine_ls_number_reflns          500 
_refine_ls_number_parameters      36 
_refine_ls_number_restraints      0 
_refine_ls_R_factor_all           0.0177 
_refine_ls_R_factor_gt            0.0153 
_refine_ls_wR_factor_ref          0.0419 
_refine_ls_wR_factor_gt           0.0413 
_refine_ls_goodness_of_fit_ref    1.405 
_refine_ls_restrained_S_all       1.405 
_refine_ls_shift/su_max           0.000 
_refine_ls_shift/su_mean          0.000 
 
loop_ 
 _atom_site_label 
 _atom_site_type_symbol 
 _atom_site_fract_x 
 _atom_site_fract_y 
 _atom_site_fract_z 
 _atom_site_U_iso_or_equiv 
 _atom_site_adp_type 
 _atom_site_occupancy 
 _atom_site_symmetry_multiplicity 
 _atom_site_calc_flag 
 _atom_site_refinement_flags 
 _atom_site_disorder_assembly 
 _atom_site_disorder_group 
K1 K 0.32149(10) 0.17851(10) 0.5000 0.0231(3) Uani 1 4 d S . . 
U1 U 0.0000 0.0000 0.249372(17) 0.00543(12) Uani 1 4 d S . . 
Si1 Si 0.11963(7) 0.38037(7) 0.19423(12) 0.0086(2) Uani 1 2 d S . . 
O1 O 0.0734(2) 0.2245(2) 0.26708(19) 0.0175(5) Uani 1 1 d . . . 
O2 O 0.1218(3) 0.3782(3) 0.0000 0.0202(8) Uani 1 4 d S . . 
O3 O 0.0000 0.5000 0.2571(3) 0.0173(15) Uani 1 4 d S . . 
O4 O 0.0000 0.0000 0.5000 0.0157(17) Uani 1 8 d S . . 
O5 O 0.0000 0.0000 0.0000 0.0186(18) Uani 1 8 d S . . 
 
loop_ 
 _atom_site_aniso_label 
 _atom_site_aniso_U_11 
 _atom_site_aniso_U_22 
 _atom_site_aniso_U_33 
 _atom_site_aniso_U_23 
 _atom_site_aniso_U_13 
 _atom_site_aniso_U_12 
K1 0.0251(5) 0.0251(5) 0.0192(6) 0.000 0.000 0.0011(5) 
U1 0.00671(13) 0.00671(13) 0.00286(16) 0.000 0.000 0.000 
Si1 0.0092(3) 0.0092(3) 0.0075(4) 0.0000(3) 0.0000(3) -0.0004(4) 
O1 0.0215(13) 0.0106(10) 0.0203(11) 0.0028(7) 0.0000(7) -0.0037(9) 
O2 0.0270(13) 0.0270(13) 0.0067(17) 0.000 0.000 0.0078(18) 
O3 0.020(2) 0.020(2) 0.013(3) 0.000 0.000 0.0099(15) 
O4 0.022(3) 0.022(3) 0.003(3) 0.000 0.000 0.000 
O5 0.027(3) 0.027(3) 0.002(3) 0.000 0.000 0.000 
 
_geom_special_details 
; 
 All esds (except the esd in the dihedral angle between two l.s. planes) 
 are estimated using the full covariance matrix.  The cell esds are taken 
 into account individually in the estimation of esds in distances, angles 
 and torsion angles; correlations between esds in cell parameters are only 
 used when they are defined by crystal symmetry.  An approximate (isotropic) 
 treatment of cell esds is used for estimating esds involving l.s. planes. 
; 
 
loop_ 
 _geom_bond_atom_site_label_1 
 _geom_bond_atom_site_label_2 
 _geom_bond_distance 
 _geom_bond_site_symmetry_2 
 _geom_bond_publ_flag 
K1 O1 3.004(2) 8_556 ? 
K1 O1 3.004(2) . ? 
K1 O1 3.004(2) 15_665 ? 
K1 O1 3.004(2) 10_556 ? 
K1 O3 3.058(2) 11_556 ? 
K1 O3 3.058(2) 3_655 ? 
K1 O1 3.129(2) 6_556 ? 
K1 O1 3.129(2) 4 ? 
K1 O1 3.129(2) 13_665 ? 
K1 O1 3.129(2) 11_556 ? 
K1 O4 3.3620(4) 5_556 ? 
K1 O4 3.3620(4) . ? 
U1 O5 2.0595(2) . ? 
U1 O4 2.0699(2) . ? 
U1 O1 2.164(2) 2 ? 
U1 O1 2.164(2) . ? 
U1 O1 2.164(2) 4 ? 
U1 O1 2.164(2) 3 ? 
U1 K1 3.9481(3) 3 ? 
U1 K1 3.9481(3) 9_556 ? 
U1 K1 3.9481(3) 11_556 ? 
Si1 O1 1.604(2) 15_665 ? 
Si1 O1 1.604(2) . ? 
Si1 O2 1.6043(10) . ? 
Si1 O3 1.6315(13) . ? 
Si1 K1 3.7546(11) 11_566 ? 
Si1 K1 3.7546(11) 3 ? 
O1 K1 3.129(2) 3 ? 
O2 Si1 1.6043(10) 10 ? 
O3 Si1 1.6315(13) 2_565 ? 
O3 K1 3.058(2) 11_566 ? 
O3 K1 3.058(2) 3 ? 
O4 U1 2.0699(2) 9_556 ? 
O4 K1 3.3620(4) 9_556 ? 
O4 K1 3.3620(4) 3 ? 
O4 K1 3.3620(4) 11_556 ? 
O5 U1 2.0595(2) 9 ? 
 
loop_ 
 _geom_angle_atom_site_label_1 
 _geom_angle_atom_site_label_2 
 _geom_angle_atom_site_label_3 
 _geom_angle 
 _geom_angle_site_symmetry_1 
 _geom_angle_site_symmetry_3 
 _geom_angle_publ_flag 
O1 K1 O1 101.47(8) 8_556 . ? 
O1 K1 O1 79.65(7) 8_556 15_665 ? 
O1 K1 O1 51.58(8) . 15_665 ? 
O1 K1 O1 51.58(8) 8_556 10_556 ? 
O1 K1 O1 79.65(7) . 10_556 ? 
O1 K1 O1 101.47(8) 15_665 10_556 ? 
O1 K1 O3 93.30(5) 8_556 11_556 ? 
O1 K1 O3 153.87(4) . 11_556 ? 
O1 K1 O3 153.87(4) 15_665 11_556 ? 
O1 K1 O3 93.30(5) 10_556 11_556 ? 
O1 K1 O3 153.87(4) 8_556 3_655 ? 
O1 K1 O3 93.30(5) . 3_655 ? 
O1 K1 O3 93.30(5) 15_665 3_655 ? 
O1 K1 O3 153.87(4) 10_556 3_655 ? 
O3 K1 O3 82.00(9) 11_556 3_655 ? 
O1 K1 O1 59.68(7) 8_556 6_556 ? 
O1 K1 O1 155.49(4) . 6_556 ? 
O1 K1 O1 106.42(7) 15_665 6_556 ? 
O1 K1 O1 97.03(4) 10_556 6_556 ? 
O3 K1 O1 49.85(4) 11_556 6_556 ? 
O3 K1 O1 99.31(5) 3_655 6_556 ? 
O1 K1 O1 155.49(4) 8_556 4 ? 
O1 K1 O1 59.68(7) . 4 ? 
O1 K1 O1 97.03(4) 15_665 4 ? 
O1 K1 O1 106.42(7) 10_556 4 ? 
O3 K1 O1 99.31(5) 11_556 4 ? 
O3 K1 O1 49.85(4) 3_655 4 ? 
O1 K1 O1 142.67(8) 6_556 4 ? 
O1 K1 O1 106.42(7) 8_556 13_665 ? 
O1 K1 O1 97.03(4) . 13_665 ? 
O1 K1 O1 59.68(7) 15_665 13_665 ? 
O1 K1 O1 155.49(4) 10_556 13_665 ? 
O3 K1 O1 99.31(5) 11_556 13_665 ? 
O3 K1 O1 49.85(4) 3_655 13_665 ? 
O1 K1 O1 75.87(7) 6_556 13_665 ? 
O1 K1 O1 92.26(7) 4 13_665 ? 
O1 K1 O1 97.03(4) 8_556 11_556 ? 
O1 K1 O1 106.42(7) . 11_556 ? 
O1 K1 O1 155.49(4) 15_665 11_556 ? 
O1 K1 O1 59.68(7) 10_556 11_556 ? 
O3 K1 O1 49.85(4) 11_556 11_556 ? 
O3 K1 O1 99.31(5) 3_655 11_556 ? 
O1 K1 O1 92.26(7) 6_556 11_556 ? 
O1 K1 O1 75.87(7) 4 11_556 ? 
O1 K1 O1 142.67(8) 13_665 11_556 ? 
O1 K1 O4 53.68(4) 8_556 5_556 ? 
O1 K1 O4 104.14(5) . 5_556 ? 
O1 K1 O4 53.68(4) 15_665 5_556 ? 
O1 K1 O4 104.14(5) 10_556 5_556 ? 
O3 K1 O4 101.976(15) 11_556 5_556 ? 
O3 K1 O4 101.976(15) 3_655 5_556 ? 
O1 K1 O4 52.76(4) 6_556 5_556 ? 
O1 K1 O4 141.36(3) 4 5_556 ? 
O1 K1 O4 52.76(4) 13_665 5_556 ? 
O1 K1 O4 141.36(3) 11_556 5_556 ? 
O1 K1 O4 104.14(5) 8_556 . ? 
O1 K1 O4 53.68(4) . . ? 
O1 K1 O4 104.14(5) 15_665 . ? 
O1 K1 O4 53.68(4) 10_556 . ? 
O3 K1 O4 101.976(15) 11_556 . ? 
O3 K1 O4 101.976(15) 3_655 . ? 
O1 K1 O4 141.36(3) 6_556 . ? 
O1 K1 O4 52.76(4) 4 . ? 
O1 K1 O4 141.36(3) 13_665 . ? 
O1 K1 O4 52.76(4) 11_556 . ? 
O4 K1 O4 148.08(4) 5_556 . ? 
O5 U1 O4 180.0 . . ? 
O5 U1 O1 93.87(4) . 2 ? 
O4 U1 O1 86.13(4) . 2 ? 
O5 U1 O1 93.87(4) . . ? 
O4 U1 O1 86.13(4) . . ? 
O1 U1 O1 172.25(8) 2 . ? 
O5 U1 O1 93.87(4) . 4 ? 
O4 U1 O1 86.13(4) . 4 ? 
O1 U1 O1 89.738(6) 2 4 ? 
O1 U1 O1 89.738(6) . 4 ? 
O5 U1 O1 93.87(4) . 3 ? 
O4 U1 O1 86.13(4) . 3 ? 
O1 U1 O1 89.738(6) 2 3 ? 
O1 U1 O1 89.738(6) . 3 ? 
O1 U1 O1 172.25(8) 4 3 ? 
O5 U1 K1 121.619(4) . . ? 
O4 U1 K1 58.381(4) . . ? 
O1 U1 K1 125.98(5) 2 . ? 
O1 U1 K1 48.83(6) . . ? 
O1 U1 K1 52.18(6) 4 . ? 
O1 U1 K1 122.85(6) 3 . ? 
O5 U1 K1 121.619(4) . 3 ? 
O4 U1 K1 58.381(4) . 3 ? 
O1 U1 K1 122.85(6) 2 3 ? 
O1 U1 K1 52.18(6) . 3 ? 
O1 U1 K1 125.98(5) 4 3 ? 
O1 U1 K1 48.83(6) 3 3 ? 
K1 U1 K1 74.047(4) . 3 ? 
O5 U1 K1 121.619(4) . 9_556 ? 
O4 U1 K1 58.381(4) . 9_556 ? 
O1 U1 K1 48.83(6) 2 9_556 ? 
O1 U1 K1 125.98(5) . 9_556 ? 
O1 U1 K1 122.85(6) 4 9_556 ? 
O1 U1 K1 52.18(6) 3 9_556 ? 
K1 U1 K1 116.762(8) . 9_556 ? 
K1 U1 K1 74.047(4) 3 9_556 ? 
O5 U1 K1 121.619(4) . 11_556 ? 
O4 U1 K1 58.381(4) . 11_556 ? 
O1 U1 K1 52.18(6) 2 11_556 ? 
O1 U1 K1 122.85(6) . 11_556 ? 
O1 U1 K1 48.83(6) 4 11_556 ? 
O1 U1 K1 125.98(5) 3 11_556 ? 
K1 U1 K1 74.047(4) . 11_556 ? 
K1 U1 K1 116.762(8) 3 11_556 ? 
K1 U1 K1 74.047(4) 9_556 11_556 ? 
O1 Si1 O1 109.13(16) 15_665 . ? 
O1 Si1 O2 111.55(10) 15_665 . ? 
O1 Si1 O2 111.55(10) . . ? 
O1 Si1 O3 107.45(10) 15_665 . ? 
O1 Si1 O3 107.45(10) . . ? 
O2 Si1 O3 109.55(18) . . ? 
O1 Si1 K1 54.65(8) 15_665 . ? 
O1 Si1 K1 54.65(8) . . ? 
O2 Si1 K1 133.05(14) . . ? 
O3 Si1 K1 117.40(11) . . ? 
O1 Si1 K1 55.18(8) 15_665 11_566 ? 
O1 Si1 K1 115.51(8) . 11_566 ? 
O2 Si1 K1 132.82(8) . 11_566 ? 
O3 Si1 K1 52.81(6) . 11_566 ? 
K1 Si1 K1 80.12(2) . 11_566 ? 
O1 Si1 K1 115.51(8) 15_665 3 ? 
O1 Si1 K1 55.18(8) . 3 ? 
O2 Si1 K1 132.82(8) . 3 ? 
O3 Si1 K1 52.81(6) . 3 ? 
K1 Si1 K1 80.12(2) . 3 ? 
K1 Si1 K1 75.87(4) 11_566 3 ? 
Si1 O1 U1 154.05(10) . . ? 
Si1 O1 K1 99.53(10) . . ? 
U1 O1 K1 98.32(7) . . ? 
Si1 O1 K1 99.94(10) . 3 ? 
U1 O1 K1 94.71(7) . 3 ? 
K1 O1 K1 101.64(5) . 3 ? 
Si1 O2 Si1 178.0(3) 10 . ? 
Si1 O3 Si1 142.9(2) 2_565 . ? 
Si1 O3 K1 102.04(6) 2_565 11_566 ? 
Si1 O3 K1 102.04(6) . 11_566 ? 
Si1 O3 K1 102.04(6) 2_565 3 ? 
Si1 O3 K1 102.04(6) . 3 ? 
K1 O3 K1 98.00(9) 11_566 3 ? 
U1 O4 U1 180.0 . 9_556 ? 
U1 O4 K1 90.0 . 9_556 ? 
U1 O4 K1 90.0 9_556 9_556 ? 
U1 O4 K1 90.0 . . ? 
U1 O4 K1 90.0 9_556 . ? 
K1 O4 K1 180.0 9_556 . ? 
U1 O4 K1 90.0 . 3 ? 
U1 O4 K1 90.0 9_556 3 ? 
K1 O4 K1 90.0 9_556 3 ? 
K1 O4 K1 90.0 . 3 ? 
U1 O4 K1 90.0 . 11_556 ? 
U1 O4 K1 90.0 9_556 11_556 ? 
K1 O4 K1 90.0 9_556 11_556 ? 
K1 O4 K1 90.0 . 11_556 ? 
K1 O4 K1 180.0 3 11_556 ? 
U1 O5 U1 180.0 9 . ? 
 
_diffrn_measured_fraction_theta_max    1.000 
_diffrn_reflns_theta_full              28.28 
_diffrn_measured_fraction_theta_full   1.000 
_refine_diff_density_max    0.878 
_refine_diff_density_min   -1.259 
_refine_diff_density_rms    0.183 
